# Supplementary material for: Interplay between Mitochondrial Protein Import and Respiratory Complexes Assembly in Neuronal Health and Degeneration
Source: MDPI journal article supplement (doi:10.3390/life11050432), 2021-05-11
Supplement: s1 [file s1]

# Interplay between Mitochondrial Protein Import and Respiratory Complexes Assembly in Neuronal Health and Degeneration

Hope I. Needs<sup>1</sup>, Margherita Protasoni<sup>2</sup>, Jeremy M. Henley<sup>1,3</sup>, Julien Prudent<sup>2</sup>, Ian Collinson<sup>1,#</sup> and Gonalo C. Pereira<sup>2,\*</sup>

<sup>1</sup> School of Biochemistry, University of Bristol, Bristol, United Kingdom

<sup>2</sup> Medical Research Council - Mitochondrial Biology Unit, University of Cambridge, Cambridge, United Kingdom

<sup>3</sup> Centre for Neuroscience and Regenerative Medicine, Faculty of Science, University of Technology Sydney, Ultimo, NSW, Australia

\* Correspondence: [g.pereira@mrc-mbu.cam.ac.uk](mailto:g.pereira@mrc-mbu.cam.ac.uk); [ian.collinson@bristol.ac.uk](mailto:ian.collinson@bristol.ac.uk)

## Supplementary Material

**Supplementary Table 1 – Supporting Table for Main Figure 3 on the Assembly of human Respiratory Complexes.** The human subunits and major assembly factors are shown alongside with their yeast orthologs counterparts. Orthologs were checked in the Alliance of Genome Resource Database, release 4.0.0. Subunits are grouped by their assembly module, whenever the respiratory complex assembly is in modular fashion. For the assembly factors the column represents the subunit/module they help with. Protein features, N-terminal targeting sequence (MTS) and transmembrane domains were extracted from Uniprot annotated entries, unless it is supported by previous works in the literature. Similarly, for the proteins where there is no practical evidence for their import route, we inferred the most probable import pathway they use.

| Respiratory Complex              | Yeast Ortholog<br>Gene Name/ Access. Number | Module                | Pre-Assembly Localisation, Features, and Import Route |
|----------------------------------|---------------------------------------------|-----------------------|-------------------------------------------------------|
| <i>Structural Subunits of CI</i> |                                             |                       |                                                       |
| ND1                              | N/A                                         | ND1/P <sub>P</sub> -a | mtDNA-encoded;<br>IMM protein;                        |

|         |     |                      |                                                                                                                                                                                    |
|---------|-----|----------------------|------------------------------------------------------------------------------------------------------------------------------------------------------------------------------------|
|         |     |                      | Inserted via OXA1L.                                                                                                                                                                |
| NDUFA3  | N/A | ND1/P <sub>P-a</sub> | IMM protein;<br>No N-terminal targeting sequence;<br>Unknown import route.                                                                                                         |
| NDUFA8  | N/A | ND1/P <sub>P-a</sub> | IMS protein;<br>Imported through the MIA pathway [1].                                                                                                                              |
| NDUFA11 | N/A | ND1/P <sub>P-a</sub> | IMM protein;<br>Expected to be inserted via TIM22 [2].                                                                                                                             |
| NDUFA13 | N/A | ND1/P <sub>P-a</sub> | IMM protein;<br>No N-terminal targeting sequence;<br>Residues 20–30 and 40–60 are mitochondrial localisation signals [3];<br>Unknown import route.                                 |
| ND2     | N/A | ND2/P <sub>P-b</sub> | mtDNA-encoded;<br>IMM protein;<br>Inserted via OXA1L.                                                                                                                              |
| ND3     | N/A | ND2/P <sub>P-b</sub> | mtDNA-encoded;<br>IMM protein;<br>Inserted via OXA1L.                                                                                                                              |
| ND4L    | N/A | ND2/P <sub>P-b</sub> | mtDNA-encoded;<br>IMM protein;<br>Inserted via OXA1L.                                                                                                                              |
| ND6     | N/A | ND2/P <sub>P-b</sub> | mtDNA-encoded;<br>IMM protein;<br>Inserted via OXA1L.                                                                                                                              |
| NDUFA10 | N/A | ND2/P <sub>P-b</sub> | Matrix protein;<br>N-terminal targeting sequence;<br>Expected to be imported through TIM23 <sup>MOTOR</sup> .                                                                      |
| NDUFA1  | N/A | ND2/P <sub>P-b</sub> | IMM protein;<br>No N-terminal targeting sequence;<br>Residues 1-27 are mitochondrial localisation signals [3, 4];<br>Expected to be imported through TIM23 <sup>SORT</sup> [3, 4]. |
| NDUFC1  | N/A | ND2/P <sub>P-b</sub> | IMM protein;<br>N-terminal targeting sequence;<br>Expected to be imported through TIM23 <sup>SORT</sup> .                                                                          |

|         |     |                      |                                                                                                               |
|---------|-----|----------------------|---------------------------------------------------------------------------------------------------------------|
| NDUFC2  | N/A | ND2/P <sub>P-b</sub> | IMM protein;<br>No N-terminal targeting sequence;<br>Expected to be inserted via TIM22 [5].                   |
| NDUFS5  | N/A | ND2/P <sub>P-b</sub> | IMS protein;<br>Imported through the MIA pathway [1].                                                         |
| ND4     | N/A | ND4/P <sub>D-a</sub> | mtDNA-encoded;<br>IMM protein;<br>Inserted via OXA1L.                                                         |
| NDUFB1  | N/A | ND4/P <sub>D-a</sub> | IMM protein;<br>No N-terminal targeting sequence;<br>Unknown import route.                                    |
| NDUFB4  | N/A | ND4/P <sub>D-a</sub> | IMM protein;<br>No N-terminal targeting sequence;<br>Unknown import route.                                    |
| NDUFB5  | N/A | ND4/P <sub>D-a</sub> | IMM protein;<br>N-terminal targeting sequence;<br>Expected to be imported through TIM23 <sup>SORT</sup> .     |
| NDUFB6  | N/A | ND4/P <sub>D-a</sub> | IMM protein;<br>No N-terminal targeting sequence;<br>Unknown import route.                                    |
| NDUFB10 | N/A | ND4/P <sub>D-a</sub> | IMS protein;<br>Imported through the MIA pathway [1].                                                         |
| NDUFB11 | N/A | ND4/P <sub>D-a</sub> | IMM protein;<br>N-terminal targeting sequence;<br>Expected to be imported through TIM23 <sup>SORT</sup> .     |
| ND5     | N/A | ND5/P <sub>D-b</sub> | mtDNA-encoded;<br>IMM protein;<br>Inserted via OXA1L.                                                         |
| NDUFAB1 | N/A | ND5/P <sub>D-b</sub> | Matrix protein;<br>N-terminal targeting sequence;<br>Expected to be imported through TIM23 <sup>MOTOR</sup> . |
| NDUFB2  | N/A | ND5/P <sub>D-b</sub> | Matrix protein;<br>N-terminal targeting sequence;<br>Expected to be imported through TIM23 <sup>MOTOR</sup> . |

|        |     |                      |                                                                                                               |
|--------|-----|----------------------|---------------------------------------------------------------------------------------------------------------|
| NDUFB3 | N/A | ND5/P <sub>D-b</sub> | IMM protein;<br>No N-terminal targeting sequence;<br>Unknown import route.                                    |
| NDUFB7 | N/A | ND5/P <sub>D-b</sub> | IMS protein;<br>Imported through the MIA pathway [1].                                                         |
| NDUFB8 | N/A | ND5/P <sub>D-b</sub> | IMM protein;<br>N-terminal targeting sequence;<br>Expected to be imported through TIM23 <sup>SORT</sup> [6].  |
| NDUFB9 | N/A | ND5/P <sub>D-b</sub> | No N-terminal targeting sequence;<br>Unknown import route.                                                    |
| NDUFA5 | N/A | Q                    | No N-terminal targeting sequence;<br>Unknown import route.                                                    |
| NDUFA6 | N/A | Q                    | No N-terminal targeting sequence;<br>Unknown import route.                                                    |
| NDUFA7 | N/A | Q                    | No N-terminal targeting sequence;<br>Unknown import route.                                                    |
| NDUFA9 | N/A | Q                    | Matrix protein;<br>N-terminal targeting sequence;<br>Expected to be imported through TIM23 <sup>MOTOR</sup> . |
| NDUFS2 | N/A | Q                    | Matrix protein;<br>N-terminal targeting sequence;<br>Expected to be imported through TIM23 <sup>MOTOR</sup> . |
| NDUFS3 | N/A | Q                    | Matrix protein;<br>N-terminal targeting sequence;<br>Expected to be imported through TIM23 <sup>MOTOR</sup> . |
| NDUFS7 | N/A | Q                    | Matrix protein;<br>N-terminal targeting sequence;<br>Expected to be imported through TIM23 <sup>MOTOR</sup> . |
| NDUFS8 | N/A | Q                    | Matrix protein;<br>N-terminal targeting sequence;<br>Expected to be imported through TIM23 <sup>MOTOR</sup> . |
| NDUFS1 | N/A | N                    | Matrix protein;<br>N-terminal targeting sequence;<br>Expected to be imported through TIM23 <sup>MOTOR</sup> . |

|                                |     |                                              |                                                                                                               |
|--------------------------------|-----|----------------------------------------------|---------------------------------------------------------------------------------------------------------------|
| NDUFS4                         | N/A | N/Q                                          | Matrix protein;<br>N-terminal targeting sequence;<br>Expected to be imported through TIM23 <sup>MOTOR</sup> . |
| NDUFS6                         | N/A | N/Q                                          | Matrix protein;<br>N-terminal targeting sequence;<br>Expected to be imported through TIM23 <sup>MOTOR</sup> . |
| NDUFV1                         | N/A | N                                            | Matrix protein;<br>N-terminal targeting sequence;<br>Expected to be imported through TIM23 <sup>MOTOR</sup> . |
| NDUFV2                         | N/A | N                                            | Matrix protein;<br>N-terminal targeting sequence;<br>Expected to be imported through TIM23 <sup>MOTOR</sup> . |
| NDUFV3                         | N/A | N/Q                                          | Matrix protein;<br>N-terminal targeting sequence;<br>Expected to be imported through TIM23 <sup>MOTOR</sup> . |
| NDUFA2                         | N/A | N                                            | Matrix protein;<br>N-terminal targeting sequence;<br>Expected to be imported through TIM23 <sup>MOTOR</sup> . |
| NDUFA12                        | N/A | N/Q                                          | No N-terminal targeting sequence;<br>Unknown import route.                                                    |
| <i>Assembly Factors for CI</i> |     |                                              |                                                                                                               |
| ACAD9                          | N/A | Assists in<br>ND2/P <sub>P-b</sub><br>module | IMM protein [7];<br>N-terminal targeting sequence;<br>Expected to be imported through TIM23 <sup>SORT</sup> . |
| ECSIT                          | N/A | Assists in<br>ND2/P <sub>P-b</sub><br>module | Matrix protein;<br>N-terminal targeting sequence;<br>Expected to be imported through TIM23 <sup>MOTOR</sup> . |
| FOXRED1                        | N/A | Assists in<br>ND4/P <sub>D-a</sub><br>module | IMM protein;<br>No N-terminal targeting sequence;<br>Unknown import route [8].                                |
| ATP5SL                         | N/A | Assists in<br>ND4/P <sub>D-a</sub><br>module | No N-terminal targeting sequence;<br>Unknown import route.                                                    |

|         |     |                                               |                                                                                                                    |
|---------|-----|-----------------------------------------------|--------------------------------------------------------------------------------------------------------------------|
| TMEM70  | N/A | Assists in ND4/P <sub>D-a</sub> module        | IMM protein;<br>N-terminal targeting sequence;<br>Unknown import route.                                            |
| NDUFAF1 | N/A | Assists in ND1/P <sub>P-a</sub> and N modules | Matrix protein;<br>N-terminal targeting sequence;<br>Expected to be imported through TIM23 <sup>MOTOR</sup> .      |
| NDUFAF2 | N/A | Assists in N module                           | Matrix protein;<br>N-terminal targeting sequence;<br>Expected to be imported through TIM23 <sup>MOTOR</sup> .      |
| NDUFAF3 | N/A | Assists in Q module                           | IMM protein [9];<br>No N-terminal targeting sequence;<br>Unknown import route [8].                                 |
| NDUFAF4 | N/A | Assists in Q module                           | IMM protein [9];<br>No N-terminal targeting sequence;<br>Unknown import route.                                     |
| NDUFAF5 | N/A | Assists in Q module                           | Matrix protein;<br>N-terminal targeting sequence;<br>Expected to be imported through TIM23 <sup>MOTOR</sup> .      |
| NDUFAF6 | N/A | Assists in ND1/P <sub>p-a</sub> module        | Matrix protein;<br>N-terminal targeting sequence;<br>Expected to be imported through TIM23 <sup>MOTOR</sup> .      |
| NDUFAF7 | N/A | Assists in Q module                           | Matrix protein [10];<br>N-terminal targeting sequence;<br>Expected to be imported through TIM23 <sup>MOTOR</sup> . |
| NUBPL   | N/A | Assists in N and Q modules                    | Matrix protein;<br>N-terminal targeting sequence;<br>Expected to be imported through TIM23 <sup>MOTOR</sup> .      |
| TIMMDC1 | N/A | Assists in ND1/P <sub>P-a</sub>               | IMM protein;<br>No N-terminal targeting sequence;<br>Expected to be inserted via TIM22 [5].                        |

|                                   |                  |                                         |                                                                                                                                                            |
|-----------------------------------|------------------|-----------------------------------------|------------------------------------------------------------------------------------------------------------------------------------------------------------|
| TMEM126B                          | N/A              | Assists in ND2/P <sub>P</sub> -b module | IMM protein;<br>No N-terminal targeting sequence;<br>Expected to be inserted via TIM22 [5].                                                                |
| TMEM186                           | N/A              | Assists in ND2/P <sub>P</sub> -b module | IMM protein;<br>N-terminal targeting sequence;<br>imported via the TIM23 <sup>SORT</sup> [11].                                                             |
| DMAC1/TMEM261                     | N/A              | Assists in ND5/P <sub>D</sub> -b module | IMM protein;<br>No N-terminal targeting sequence;<br>Unknown import route.                                                                                 |
| COA1                              | COA1 / YIL157C   | Assists in ND2/P <sub>P</sub> -b module | IMM protein;<br>No N-terminal targeting sequence;<br>Unknown import route.                                                                                 |
| <i>Structural Subunits of CII</i> |                  |                                         |                                                                                                                                                            |
| SDHA                              | SDH1 / YKL148C   | Non-modular                             | Matrix protein;<br>N-terminal targeting sequence inferred by similarity with porcine sequence;<br>Expected to be imported through TIM23 <sup>MOTOR</sup> . |
| SDHB                              | SDH2 / YLL041C   | Non-modular                             | Matrix protein;<br>N-terminal targeting sequence;<br>Expected to be imported through TIM23 <sup>MOTOR</sup> .                                              |
| SDHC                              | SDH3 / YKL141W   | Hydrophobic module                      | IMM protein;<br>N-terminal targeting sequence;<br>expected to be imported through TIM23 <sup>SORT</sup> [12].                                              |
| SDHD                              | SDH4 / YDR178W   | Hydrophobic module                      | IMM protein;<br>N-terminal targeting sequence;<br>Expected to be imported through TIM23 <sup>SORT</sup> [12].                                              |
| <i>Assembly Factors for CII</i>   |                  |                                         |                                                                                                                                                            |
| SDHAF1                            | SDH6 / YDR379C-A | Maturation of SDHB                      | Matrix protein;<br>Non-cleavable N-terminal targeting sequence.                                                                                            |
| SDHAF2                            | SDH5 / YOL071W   | Flavinylation of SDHA                   | Matrix protein;<br>N-terminal targeting sequence;<br>Expected to be imported through TIM23 <sup>MOTOR</sup> [13].                                          |
| SDHAF3                            | SDH7 / YDR511W   | Maturation of SDHB                      | Matrix protein;<br>N-terminal targeting sequence;                                                                                                          |

|                                    |                |                              |                                                                                                                                                                                                                               |
|------------------------------------|----------------|------------------------------|-------------------------------------------------------------------------------------------------------------------------------------------------------------------------------------------------------------------------------|
|                                    |                |                              | Expected to be imported through TIM23 <sup>MOTOR</sup> .                                                                                                                                                                      |
| SDHAF4                             | SDH8 / YBR269C | Interacts with mature SDHA   | Matrix protein;<br>N-terminal targeting sequence;<br>Expected to be imported through TIM23 <sup>MOTOR</sup> .                                                                                                                 |
| <i>Structural Subunits of CIII</i> |                |                              |                                                                                                                                                                                                                               |
| UQCRC1                             | COR1 / YBL045C | Non-modular                  | Matrix protein;<br>N-terminal targeting sequence;<br>Expected to be imported through TIM23 <sup>MOTOR</sup> .                                                                                                                 |
| UQCRC2                             | QCR2 / YPR191W | Non-modular                  | Matrix protein;<br>N-terminal targeting sequence;<br>Expected to be imported through TIM23 <sup>MOTOR</sup> .                                                                                                                 |
| MTCYB                              | COB / Q0105    | Non-modular                  | mtDNA-encoded<br>IMM protein;<br>Inserted via OXA1L.                                                                                                                                                                          |
| CYC1                               | CYT1 / YOR065W | Intermediate-assembly module | IMM protein;<br>N-terminal targeting sequence;<br>Unclear if it is imported into the matrix and then re-located to the IMM or inserted in the IMM through lateral release (stop-transfer) via TIM23 <sup>SORT</sup> [14, 15]. |
| UQCRFS1                            | RIP1 / YEL024W | Non-modular                  | IMM protein;<br>Targeted to the matrix and exported in the IMS via BCS1 [16].                                                                                                                                                 |
| UQCRH                              | QCR6 / YFR033C | Intermediate-assembly module | Matrix protein;<br>N-terminal targeting sequence;<br>Expected to be imported through TIM23 <sup>MOTOR</sup> .                                                                                                                 |
| UQCRB                              | QCR7 / YDR529C | Non-modular                  | Matrix protein<br>No N-terminal targeting sequence;<br>Unknown import route.                                                                                                                                                  |
| UQCRQ                              | QCR8 / YJL166W | Non-modular                  | IMM protein;<br>No N-terminal targeting sequence;<br>Unknown import route.                                                                                                                                                    |
| UQCR10                             | QCR9 / YGR183C | Intermediate-assembly module | IMM protein;<br>No N-terminal targeting sequence;<br>Unknown import route.                                                                                                                                                    |
| UQCR11                             | N/A            | Non-modular                  | IMM protein;                                                                                                                                                                                                                  |



|                                   |                                                    |                       |                                                                                                                                           |
|-----------------------------------|----------------------------------------------------|-----------------------|-------------------------------------------------------------------------------------------------------------------------------------------|
|                                   |                                                    |                       | No N-terminal targeting sequence;<br>Unknown import route.                                                                                |
| <i>Assembly Factors for CIII</i>  |                                                    |                       |                                                                                                                                           |
| UQCC1                             | CBP3 / YPL215W                                     | MTCYB                 | Matrix protein;<br>No N-terminal targeting sequence;<br>Unknown import route.                                                             |
| UQCC2                             | N/A                                                | MTCYB                 | Matrix protein;<br>N-terminal targeting sequence;<br>Expected to be imported through TIM23 <sup>MOTOR</sup> .                             |
| UQCC3                             | N/A                                                | MTCYB                 | IMM protein;<br>No N-terminal targeting sequence;<br>Unknown import route.                                                                |
| HCCS                              | Cyt2                                               | CYC1                  | IMM-associated protein;<br>No N-terminal targeting sequence;<br>Unknown import route [17].                                                |
| BCS1L                             | BCS1 / YDR375C                                     | UQCRFS1               | IMM protein;<br>No N-terminal targeting sequence;<br>Expected to be imported through TIM23 <sup>MOTOR</sup> based on yeast ortholog [18]. |
| LYRM7                             | MZM1 / YDR493W                                     | UQCRFS1               | Matrix protein;<br>No N-terminal targeting sequence;<br>Unknown import route.                                                             |
| TTC19                             | N/A                                                | UQCRFS1               | IMM protein;<br>N-terminal targeting sequence;<br>Unknown import route.                                                                   |
| <i>Structural Subunits of CIV</i> |                                                    |                       |                                                                                                                                           |
| MTCO1                             | COX1 / Q0045                                       | MTCO1-module          | mtDNA-encoded;<br>IMM protein;<br>Inserted via OXA1L.                                                                                     |
| COX4I1                            | Paralogs<br>COX5A / YNL052W and<br>COX5B / YIL111W | Early-assembly-module | IMM protein;<br>N-terminal targeting sequence<br>Imported via TIM23 <sup>SORT</sup> [19].                                                 |

|        |                 |                       |                                                                                                                                       |
|--------|-----------------|-----------------------|---------------------------------------------------------------------------------------------------------------------------------------|
| COX5A  | COX6 / YHR051W  | Early-assembly-module | Matrix protein<br>N-terminal targeting sequence;<br>Expected to be imported through TIM23 <sup>MOTOR</sup> .                          |
| MTCO2  | COX2 / Q0250    | MTCO2-module          | mtDNA-encoded;<br>IMM protein;<br>Inserted via OXA1L.                                                                                 |
| COX5B  | COX4 / YGL187C  | MTCO2-module          | Matrix protein<br>N-terminal targeting sequence;<br>Expected to be imported through TIM23 <sup>MOTOR</sup> .                          |
| COX6C  | N/A             | MTCO2-module          | IMM protein;<br>No N-terminal targeting sequence;<br>Interacts with TIM21, expected to be imported through TIM23 <sup>SORT</sup> [6]. |
| COX7B  | N/A             | MTCO2-module          | IMM protein;<br>N-terminal targeting sequence;<br>Expected to be imported through TIM23 <sup>SORT</sup> .                             |
| COX7C  | COX8 / YLR395C  | MTCO2-module          | IMM protein;<br>N-terminal targeting sequence;<br>Expected to be imported through TIM23 <sup>SORT</sup> .                             |
| COX8A  | N/A             | MTCO2-module          | IMM protein;<br>N-terminal targeting sequence;<br>Expected to be imported through TIM23 <sup>SORT</sup> .                             |
| MTCO3  | COX3 / Q0275    | MTCO3-module          | mtDNA-encoded;<br>IMM protein;<br>Inserted via OXA1L.                                                                                 |
| COX6A1 | COX13 / YGL191W | MTCO3-module          | IMM protein;<br>N-terminal targeting sequence;<br>Expected to be imported through TIM23 <sup>SORT</sup> .                             |
| COX6A2 | COX13 / YGL191W | MTCO3-module          | IMM protein;<br>N-terminal targeting sequence;<br>Expected to be imported through TIM23 <sup>SORT</sup> .                             |
| COX6B1 | COX12 / YLR038C | MTCO3-module          | IMS protein;<br>No N-terminal targeting sequence;<br>Imported through the MIA pathway.                                                |

|                                 |                 |                                                                           |                                                                                                                                      |
|---------------------------------|-----------------|---------------------------------------------------------------------------|--------------------------------------------------------------------------------------------------------------------------------------|
| COX7A                           | COX7 / YMR256C  | MTCO3-module                                                              | IMM protein;<br>N-terminal targeting sequence;<br>Expected to be imported through TIM23 <sup>SORT</sup> .                            |
| NDUFA4                          | N/A             | N/A                                                                       | IMM protein;<br>No N-terminal targeting sequence;<br>Unknown import route.                                                           |
| <i>Assembly Factors for CIV</i> |                 |                                                                           |                                                                                                                                      |
| TACO1                           | DPC29 / YGR021W | MTCO1 translation                                                         | Matrix protein;<br>No N-terminal targeting sequence;<br>Unknown import route.                                                        |
| LRPPRC                          | N/A             | N/A                                                                       | Matrix protein;<br>N-terminal targeting sequence;<br>Expected to be imported through TIM23 <sup>MOTOR</sup> .                        |
| FASTKD2                         | N/A             | Post-transcriptional RNA maturation, ribosome biogenesis and translation. | Matrix protein;<br>Might contain an N-terminal targeting sequence;<br>Expected to be imported through TIM23 <sup>MOTOR</sup> .       |
| COX10                           | COX10 / YPL172C | MTCO1-module;<br>Heme <i>a</i> synthesis                                  | IMM protein;<br>Might contain an N-terminal targeting sequence;<br>Expected to be imported through TIM23 <sup>SORT</sup> and others. |
| COX15                           | COX15 / YER141W | MTCO1-module;<br>Heme <i>a</i> synthesis                                  | IMM protein;<br>N-terminal targeting sequence;<br>Expected to be imported through TIM23 <sup>SORT</sup> .                            |
| SURF1                           | SHY1 / YGR112W  | MTCO1-module;<br>Insertion or stabilisation of heme <i>a</i> <sub>3</sub> | IMM protein;<br>N-terminal targeting sequence;<br>Expected to be imported through TIM23 <sup>SORT</sup> .                            |

|                |                   |                                       |                                                                                                                            |
|----------------|-------------------|---------------------------------------|----------------------------------------------------------------------------------------------------------------------------|
| COA6           | COA6 / YMR244C-A  | MTCO2-module;<br>Copper homeostasis   | IMS protein;<br>Imported through the MIA pathway [20].                                                                     |
| SCO1           | SCO1 / YBR037C    | MTCO2-module;<br>Copper incorporation | IMM protein;<br>N-terminal targeting sequence;<br>Expected to be imported through TIM23 <sup>SORT</sup> .                  |
| SCO2           | SCO2 / YBR024W    | MTCO2-module;<br>Copper incorporation | IMM protein;<br>N-terminal targeting sequence;<br>Expected to be imported through TIM23 <sup>SORT</sup> .                  |
| COX11          | COX11 / YPL132W   | MTCO1-module;<br>Copper chaperone     | IMM protein;<br>Might contain an N-terminal targeting sequence;<br>Expected to be imported through TIM23 <sup>SORT</sup> . |
| COX16          | COX16 / YJL003W   | MTCO2-module                          | IMM protein;<br>No N-terminal targeting sequence;<br>Unknown import route.                                                 |
| COX17          | COX17 / YLL009C   | MTCO1-module;<br>Copper transfer      | IMS protein;<br>Imported through the MIA pathway in yeast [21].                                                            |
| COX19          | COX19 / YLL018C-A | MTCO1-module;<br>COX11 stabilisation  | IMS protein;<br>Imported through the MIA pathway.                                                                          |
| COA3/MITRAC12  | COA3 / YJL062W-A  | MTCO1-module                          | IMM protein;<br>N-terminal targeting sequence [22];<br>Possibly interacts with OXA1 [22].                                  |
| COA7           | N/A               | N/A                                   | IMS protein;<br>Imported through the MIA pathway.                                                                          |
| COX14/c12orf62 | COX14 / YML129C   | MTCO1-module                          | IMM protein;<br>Contains mitochondrial targeting sequences [22].                                                           |

|                                  |                                              |                                    |                                                                                                                    |
|----------------------------------|----------------------------------------------|------------------------------------|--------------------------------------------------------------------------------------------------------------------|
| CMC1                             | CMC1 / YKL137W                               | MTCO1-module                       | IMS protein;<br>Imported through the MIA pathway [23].                                                             |
| COX20/FAM36A                     | COX20 / YDR231C                              | MTCO2-module;<br>Copper metalation | IMM protein;<br>No N-terminal targeting sequence;<br>Imported through the MIA pathway [24].                        |
| PET100                           | PET100 / YDR079W                             | S3 intermediary                    | IMM protein;<br>No N-terminal targeting sequence [25];<br>Unknown import route.                                    |
| PET117                           | PET117 / YER058W                             | S3 intermediary                    | Matrix protein;<br>N-terminal targeting sequence;<br>Expected to be imported through TIM23 <sup>MOTOR</sup> .      |
| PNKD/MR-1S                       | Paralogs<br>GLO2 / YDR272W<br>GLO4 / YOR040W | S3 intermediary                    | IMM protein [26];<br>N-terminal targeting sequence;<br>Expected to be imported through TIM23 <sup>SORT</sup> [26]. |
| COA8                             | N/A                                          | N/A                                | IMM protein [27];<br>N-terminal targeting sequence;<br>Expected to be imported through TIM23 <sup>SORT</sup> .     |
| COX18                            | COX18 / YGR062C                              | MTCO2-module                       | IMM protein;<br>N-terminal targeting sequence [28];<br>Expected to be imported through TIM23 <sup>SORT</sup> .     |
| <i>Structural Subunits of CV</i> |                                              |                                    |                                                                                                                    |
| ATP5F1A                          | ATP1 / YBL099W                               | F1 catalytic head                  | Matrix protein;<br>N-terminal targeting sequence;<br>Expected to be imported through TIM23 <sup>MOTOR</sup> .      |
| ATP5F1B                          | ATP2 / YJR121W                               | F1 catalytic head                  | Matrix protein;<br>N-terminal targeting sequence;<br>Expected to be imported through TIM23 <sup>MOTOR</sup> .      |
| ATP5F1C                          | ATP3 / YBR039W                               | F1 central stalk                   | Matrix protein;<br>N-terminal targeting sequence;<br>Expected to be imported through TIM23 <sup>MOTOR</sup> .      |
| ATP5F1D                          | ATP16 / YDL004W                              | F1 central stalk                   | Matrix protein;<br>N-terminal targeting sequence;<br>Expected to be imported through TIM23 <sup>MOTOR</sup> .      |

|         |                   |                           |                                                                                                                  |
|---------|-------------------|---------------------------|------------------------------------------------------------------------------------------------------------------|
| ATP5F1E | ATP15 / YPL271W   | F1 central stalk          | Matrix protein;<br>No N-terminal targeting sequence;<br>Expected to be imported through TIM23 <sup>MOTOR</sup> . |
| ATP5MC1 | ATP9 / Q0130      | Fo rotor                  | IMM protein;<br>N-terminal targeting sequence;<br>Expected to be imported through TIM23 <sup>SORT</sup> .        |
| ATP5MC2 |                   |                           | IMM protein;<br>N-terminal targeting sequence;<br>Expected to be imported through TIM23 <sup>SORT</sup> .        |
| ATP5MC3 |                   |                           | IMM protein;<br>N-terminal targeting sequence;<br>Expected to be imported through TIM23 <sup>SORT</sup> .        |
| MT-ATP6 | ATP6 / Q0085      | Fo rotor                  | mtDNA-encoded;<br>IMM protein;<br>Imported via OXA1L.                                                            |
| MT-ATP8 | ATP8 / Q0080      | Fo rotor                  | mtDNA-encoded;<br>IMM protein;<br>Imported via OXA1L.                                                            |
| ATP5ME  | ATP21 / YDR322C-A | Fo supernumerary subunits | IMM protein;<br>No N-terminal targeting sequence;<br>Unknown import route.                                       |
| ATP5MF  | ATP17 / YDR377W   | Fo supernumerary subunits | IMM protein;<br>No N-terminal targeting sequence;<br>Unknown import route.                                       |
| ATP5MG  | ATP20 / YPR020W   | Fo supernumerary subunits | IMM protein;<br>No N-terminal targeting sequence;<br>Unknown import route.                                       |
| ATP5MJ  | ATP18 / YML081C-A | Fo supernumerary subunits | IMM protein;<br>No N-terminal targeting sequence;<br>Unknown import route.                                       |
| ATP5MK  | ATP19 / YOL077W-A | Fo supernumerary subunits | IMM protein;<br>No N-terminal targeting sequence;<br>Unknown import route.                                       |

|                                |                 |                        |                                                                                                               |
|--------------------------------|-----------------|------------------------|---------------------------------------------------------------------------------------------------------------|
| ATP5PB                         | ATP4 / YPL078C  | Fo peripheral stalk    | Matrix protein;<br>N-terminal targeting sequence;<br>Expected to be imported through TIM23 <sup>MOTOR</sup> . |
| ATP5PD                         | ATP7 / YKL016C  | Fo peripheral stalk    | Matrix protein;<br>No N-terminal targeting sequence;<br>Unknown import route.                                 |
| ATP5PF                         | ATP14 / YLR295C | Fo peripheral stalk    | Matrix protein;<br>N-terminal targeting sequence;<br>Expected to be imported through TIM23 <sup>MOTOR</sup> . |
| ATP5PO                         | ATP5 / YDR298C  | Fo peripheral stalk    | Matrix protein;<br>N-terminal targeting sequence;<br>Expected to be imported through TIM23 <sup>MOTOR</sup> . |
| <i>Assembly Factors for CV</i> |                 |                        |                                                                                                               |
| ATPAF1/ATP11                   | ATP11 / YNL315C | F <sub>1</sub> -module | Matrix protein;<br>N-terminal targeting sequence;<br>Expected to be imported through TIM23 <sup>MOTOR</sup> . |
| ATPAF2/ATP12                   | ATP12 / YJL180C | F <sub>1</sub> -module | Matrix protein;<br>N-terminal targeting sequence;<br>Expected to be imported through TIM23 <sup>MOTOR</sup> . |
| FMC1/C7orf55                   | FMC1 / YIL098C  | F <sub>1</sub> -module | No N-terminal targeting sequence;<br>Unknown import route.                                                    |
| TMEM70                         | N/A             | c-ring                 | IMM protein;<br>N-terminal targeting sequence;<br>Expected to be imported through TIM23 <sup>SORT</sup> .     |
| TMEM242                        | N/A             | c-ring                 | IMM protein;<br>No N-terminal targeting sequence;<br>Unknown import route.                                    |
| ATP23                          | ATP23 / YNR020C | N/A                    | No N-terminal targeting sequence;<br>Imported through the MIA pathway in yeast [29].                          |

## References

1. Friederich, M.W., et al., *Mutations in the accessory subunit NDUFB10 result in isolated complex I deficiency and illustrate the critical role of intermembrane space import for complex I holoenzyme assembly*. Human Molecular Genetics, 2017. **26**(4): p. 702-716.
2. Jackson, T.D., et al., *The TIM22 complex mediates the import of Sideroflexins and is required for efficient mitochondrial one-carbon metabolism*. Molecular Biology of the Cell. **0**(0): p. mbc.E20-06-0390.
3. Lu, H. and X.M. Cao, *GRIM-19 is essential for maintenance of mitochondrial membrane potential*. Molecular Biology of the Cell, 2008. **19**(5): p. 1893-1902.
4. Yadava, N. and I.E. Scheffler, *Import and orientation of the MWFE protein in mitochondrial NADH-ubiquinone oxidoreductase*. Mitochondrion, 2004. **4**(1): p. 1-12.
5. Sanchez-Caballero, L., S. Guerrero-Castillo, and L. Nijtmans, *Unraveling the complexity of mitochondrial complex I assembly: A dynamic process*. Biochimica Et Biophysica Acta-Bioenergetics, 2016. **1857**(7): p. 980-990.
6. Mick, D.U., et al., *MITRAC Links Mitochondrial Protein Translocation to Respiratory-Chain Assembly and Translational Regulation*. Cell, 2012. **151**(7): p. 1528-1541.
7. Ensenauer, R., et al., *Human acyl-CoA dehydrogenase-9 plays a novel role in the mitochondrial beta-oxidation of unsaturated fatty acids*. Journal of Biological Chemistry, 2005. **280**(37): p. 32309-32316.
8. Formosa, L.E., et al., *Characterization of mitochondrial FOXRED1 in the assembly of respiratory chain complex I*. Human Molecular Genetics, 2015. **24**(10): p. 2952-2965.
9. Saada, A., et al., *Mutations in NDUFAP3 (C3ORF60), Encoding an NDUFAP4 (C6ORF66)-interacting Complex I Assembly Protein, Cause Fatal Neonatal Mitochondrial Disease*. American Journal of Human Genetics, 2009. **84**(6): p. 718-727.
10. Rendon, O.Z., et al., *The arginine methyltransferase NDUFAP7 is essential for complex I assembly and early vertebrate embryogenesis*. Human Molecular Genetics, 2014. **23**(19): p. 5159-5170.
11. Formosa, L.E., et al., *Dissecting the Roles of Mitochondrial Complex I Intermediate Assembly Complex Factors in the Biogenesis of Complex I*. Cell Reports, 2020. **31**(3): p. 19.
12. Van Vranken, J.G., et al., *Protein-mediated assembly of succinate dehydrogenase and its cofactors*. Critical Reviews in Biochemistry and Molecular Biology, 2015. **50**(2): p. 168-180.
13. Bezawork-Geleta, A., et al., *Mitochondrial matrix proteostasis is linked to hereditary paraganglioma: LON-mediated turnover of the human flavinylation factor SDH5 is regulated by its interaction with SDHA*. Faseb Journal, 2014. **28**(4): p. 1794-1804.
14. Ndi, M., et al., *Biogenesis of the bc(1) Complex of the Mitochondria! Respiratory Chain*. Journal of Molecular Biology, 2018. **430**(21): p. 3892-3905.
15. Arnold, I., et al., *Two distinct and independent mitochondrial targeting signals function in the sorting of an inner membrane protein, cytochrome c(1)*. Journal of Biological Chemistry, 1998. **273**(3): p. 1469-1476.
16. Wegener, N., et al., *A Pathway of Protein Translocation in Mitochondria Mediated by the AAA-ATPase Bcsl*. Molecular Cell, 2011. **44**(2): p. 191-202.



17. Allen, J.W.A., *Cytochrome c biogenesis in mitochondria - Systems III and V*. Febs Journal, 2011. **278**(22): p. 4198-4216.
18. Folsch, H., et al., *Internal targeting signal of the BCS1 protein: a novel mechanism of import into mitochondria*. EMBO J, 1996. **15**(3): p. 479-87.
19. Priesnitz, C. and T. Becker, *Pathways to balance mitochondrial translation and protein import*. Genes & Development, 2018. **32**(19-20): p. 1285-1296.
20. Stroud, D.A., et al., *COA6 is a mitochondrial complex IV assembly factor critical for biogenesis of mtDNA-encoded COX2*. Human Molecular Genetics, 2015. **24**(19): p. 5404-5415.
21. Koch, J.R. and F.X. Schmid, *Mia40 targets cysteines in a hydrophobic environment to direct oxidative protein folding in the mitochondria*. Nature Communications, 2014. **5**: p. 10.
22. Watson, S.A. and G.P. McStay, *Functions of Cytochrome c Oxidase Assembly Factors*. International Journal of Molecular Sciences, 2020. **21**(19): p. 17.
23. Bourens, M., et al., *Role of Twin Cys-Xaa(9)-Cys Motif Cysteines in Mitochondrial Import of the Cytochrome c Oxidase Biogenesis Factor Cmc1*. Journal of Biological Chemistry, 2012. **287**(37): p. 31258-31269.
24. Nuebel, E., P. Manganas, and K. Tokatlidis, *Orphan proteins of unknown function in the mitochondrial intermembrane space proteome: New pathways and metabolic cross-talk*. Biochimica Et Biophysica Acta-Molecular Cell Research, 2016. **1863**(11): p. 2613-2623.
25. Lim, S.C., et al., *A Founder Mutation in PET100 Causes Isolated Complex IV Deficiency in Lebanese Individuals with Leigh Syndrome*. American Journal of Human Genetics, 2014. **94**(2): p. 209-222.
26. Ghezzi, D., et al., *Paroxysmal non-kinesigenic dyskinesia is caused by mutations of the MR-1 mitochondrial targeting sequence*. Hum Mol Genet, 2009. **18**(6): p. 1058-64.
27. Signes, A., et al., *APOPT1/COA8 assists COX assembly and is oppositely regulated by UPS and ROS*. Embo Molecular Medicine, 2019. **11**(1): p. 21.
28. Bourens, M. and A. Barrientos, *Human mitochondrial cytochrome c oxidase assembly factor COX18 acts transiently as a membrane insertase within the subunit 2 maturation module*. Journal of Biological Chemistry, 2017. **292**(19): p. 7774-7783.
29. Weckbecker, D., et al., *Atp23 biogenesis reveals a chaperone-like folding activity of Mia40 in the IMS of mitochondria*. Embo Journal, 2012. **31**(22): p. 4348-4358.
